# Supplementary material for: Electrochemically active phenylenediamine probes for transition metal cation detection
Source: Royal Society of Chemistry journal article supplement (doi:10.1039/c0nj00638f), 2011-01-01
Supplement: c0nj00638f.pdf [file c0nj00638f.pdf]

## Electrochemically Active Phenylenediamine Probes for Transition Metal Cation Detection

Rihab Sahli, Noureddine Raouafi, Khaled Boujlel, Emmanuel Maisonhaute, Bernd Schöllhorn, Christian Amatore

### Supplementary information

The first oxidation process of **1** is fully reversible: the linear dependence of the logarithm of the first peak current ( $I_{pa}^1$ ) versus the logarithm of the scan rate ( $\log i_p \sim \log v$ ) in the range of 50-1000  $\text{mVs}^{-1}$  confirms a diffusion controlled electron transfer process for all compounds, the slope of the curve being close to 0.5.<sup>1</sup> The potential difference between the anodic and cathodic peaks ( $\Delta E_p = E_{pa} - E_{pc}$ ) of the first oxidation wave is close to 60 mV for all studied compounds, confirming reversible one electron transfer.

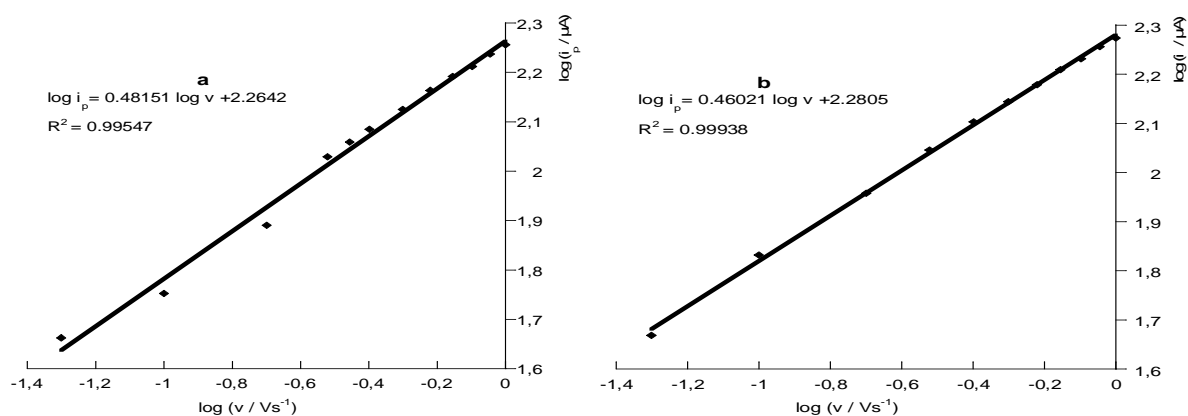

**Figure S-1.** Variation of the logarithm of the first anodic peak current ( $I_{pa}^1$ ) of compound a) **1a** (4 mM) and b) **1c** (4 mM) as a function of the logarithm of scan rate measured in 0.1M TBABF<sub>4</sub> / acetonitrile solution.

<sup>1</sup> R.S. Nicholson, I. Shain, *Anal. Chem.*, **1964**, 36, 706-723.

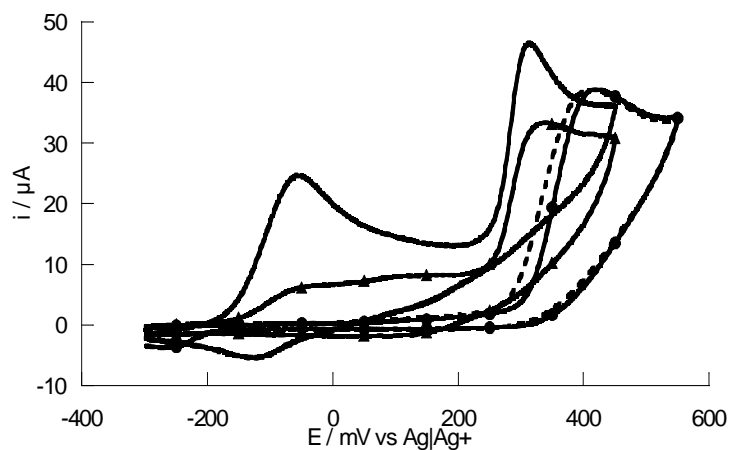

**Figure S-2.** Cyclic voltammograms of **1a** (2 mM) in the presence of 0, 0.2, 0.5 and 1 equiv. of  $\text{Zn}(\text{ClO}_4)_2$ . Scan rate:  $0.1 \text{ Vs}^{-1}$ .

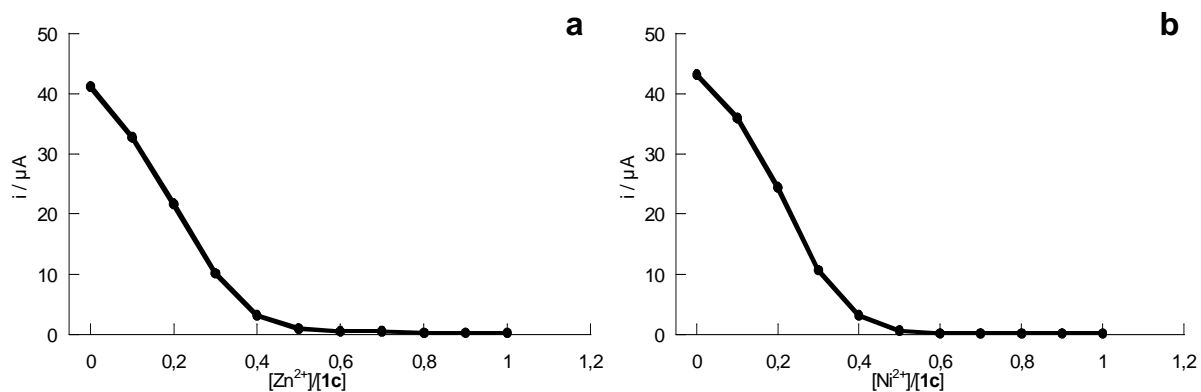

**Figure S-3:** Variation of the peak current  $i_{pa}$  of compound **1c** depending on the relative metal ion concentration of the number of  $\text{Zn}^{2+}$  (a) or  $\text{Ni}^{2+}$  (b).  $C = 2 \text{ mM}$ .

## Selectivity

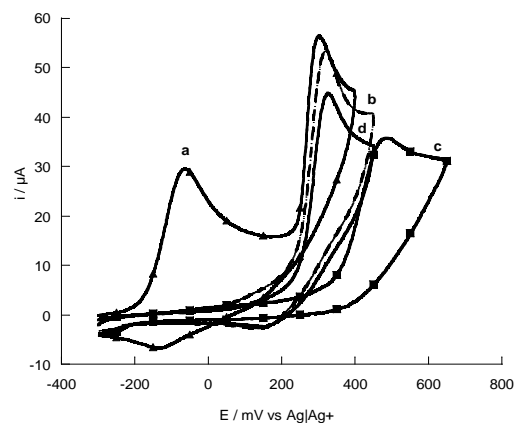

**Figure S-4:** Cyclic voltammograms of (a) **1a** (2 mM) alone (—▲—), (b) **1a** in the presence of 1 mM of  $\text{Cd}^{2+}$  (---), (c) **1a** in the presence of 1 mM of  $\text{Ni}^{2+}$  (—■—) and (d) solution (b) in the presence of 1 mM of  $\text{Ni}^{2+}$  (—) in 0.1M TBABF<sub>4</sub> acetonitrile solution. Scan rate:  $0.1\text{Vs}^{-1}$ ;

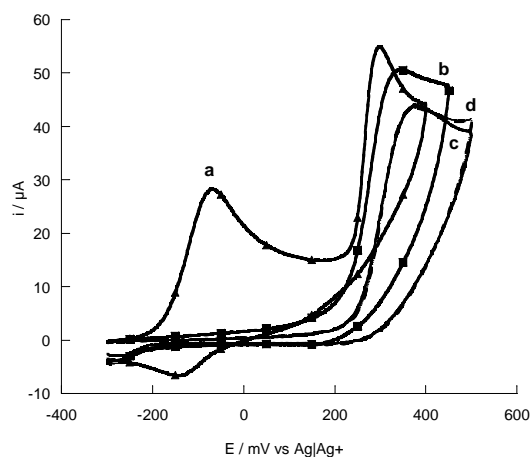

**Figure S-5:** Cyclic voltammograms of (a) **1a** (2 mM) alone (—▲—), (b) **1a** in the presence of 1 mM of  $\text{Cd}^{2+}$  (—■—), (c) **1a** in the presence of 1 mM of  $\text{Zn}^{2+}$  (—) and (d) solution (b) in the presence of 1 mM of  $\text{Zn}^{2+}$  (---) in 0.1M TBABF<sub>4</sub> acetonitrile solution. Scan rate:  $0.1\text{Vs}^{-1}$ ;

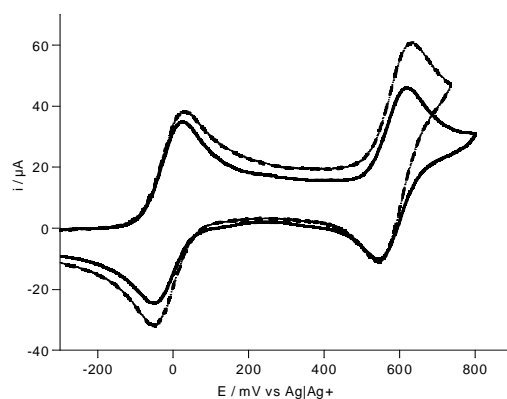

**Figure S-6:** Cyclic voltammograms of **2a** (2 mM) in the absence (solid line) and presence (dashed line) of 1 equiv. of  $\text{Cd}(\text{ClO}_4)_2$  (2 mM) in 0.1M TBABF<sub>4</sub> acetonitrile with a scan rate of  $0.1\text{Vs}^{-1}$ .
